# Supplementary material for: A Multimodel Study of the Role of Novel PKC Isoforms in the DNA Integrity Checkpoint
Source: MDPI journal article supplement (doi:10.3390/ijms242115796), 2023-10-31
Supplement: s1 [file s1]

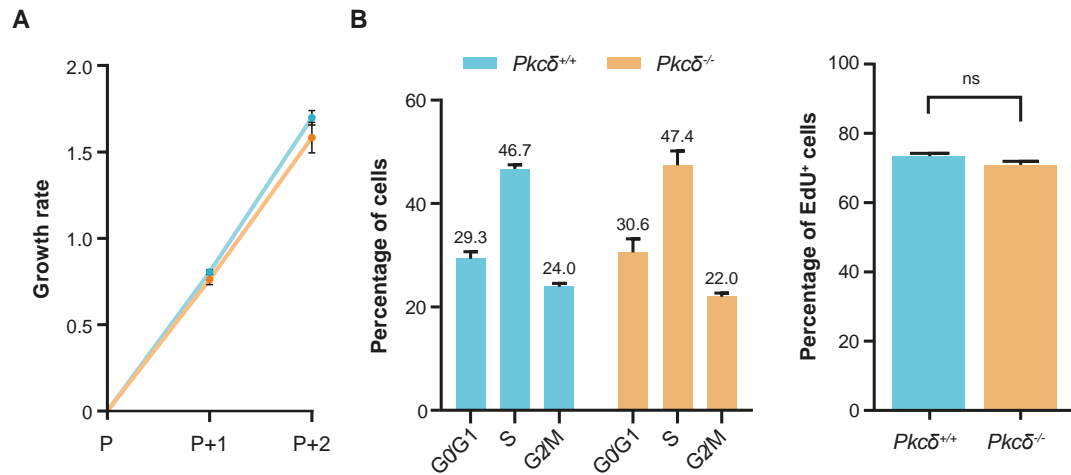

**Figure S1. Analysis of cell growth and cell cycle dynamics of mESCs deficient for PKC $\delta$ .** **A)** The growth of the  $Pkc\delta^{-/-}$  and  $Pkc\delta^{+/+}$  mESC lines was analyzed along two consecutive cell passages. To obtain the growth rate, the natural logarithm of the expansion factor (cell population divided by the number of cells initially plated) was in turn divided by the number of days. **B) Left panel:** Murine  $Pkc\delta^{-/-}$  and  $Pkc\delta^{+/+}$  mESCs were dissociated and stained with 25  $\mu\text{g}/\text{ml}$  propidium iodide (Sigma Cat#P4864) with 25  $\mu\text{g}/\text{ml}$  RNase (Roche Cat#10109142001) and their cell cycle distribution was analyzed using a BD FACSVerse flow cytometer. **Right panel:** Murine  $Pkc\delta^{-/-}$  and  $Pkc\delta^{+/+}$  ESCs received 10  $\mu\text{M}$  EdU pulse for 1h before being dissociated and processed for EdU detection with the Click-iT<sup>TM</sup> Plus EdU Alexa Fluor<sup>TM</sup> 555 Flow Cytometry Assay Kit (ThermoFisher Cat#C10638). The samples were analyzed in a LSR-Fortessa flow cytometer to obtain the percentage of EdU<sup>+</sup> cells.

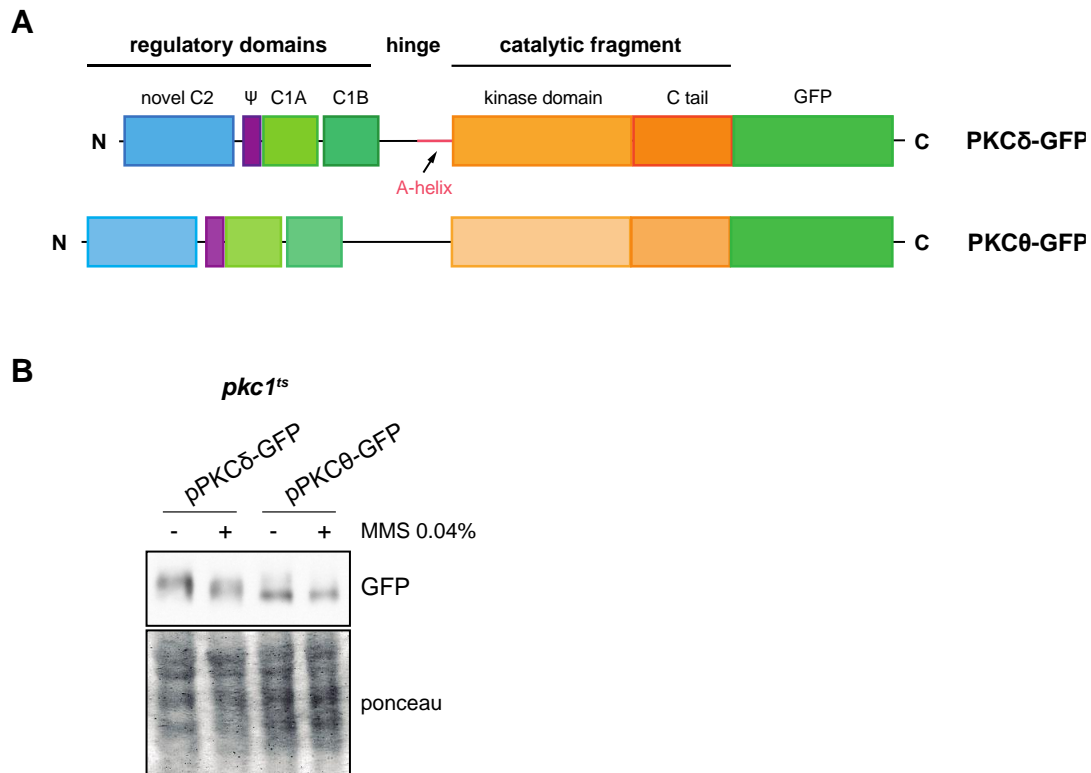

**Figure S2. Protein level analysis of PKCδ and PKCθ.** **A)** Schematic representation of GFP-tagged PKCδ and PKCθ proteins. **B)** Exponentially growing cultures of the *pkc1<sup>ts</sup>* (JC6-3a) strain transformed with plasmids pPKCδ-GFP and pPKCθ-GFP were transferred to 37°C for 3 hours and then incubated in the absence or presence of MMS 0.04% for 1 hour. Protein levels of GFP-tagged PKCδ and PKCθ were detected by western blot. Ponceau staining of the membrane is shown as loading control.

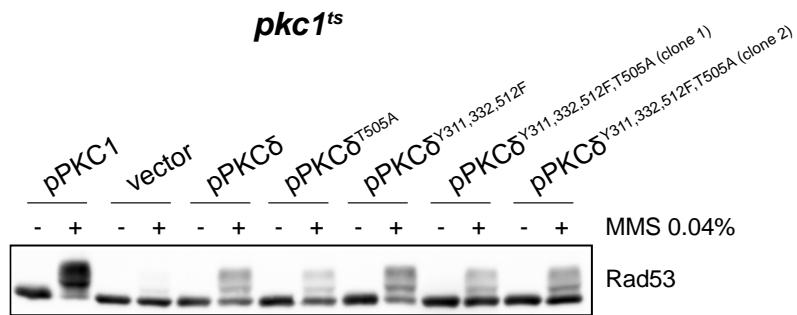

**Figure S3. Analysis of DNA integrity checkpoint activation in key Tyr mutants in PKC $\delta$  oxidative stress response.** Exponentially growing cultures of the *pkc1<sup>ts</sup>* (JC6-3a) strain transformed with plasmids pPKC1, pPKC $\delta$ , pPKC $\delta^{Y311F, Y332F, Y512F}$ , pPKC $\delta^{Y311F, Y332F, Y512F, T505A}$  or with an empty vector were transferred to 37°C for 3 hours and then incubated in the absence or presence of MMS 0.04% for 1 hour. The activation of Rad53 was analyzed by western blot.

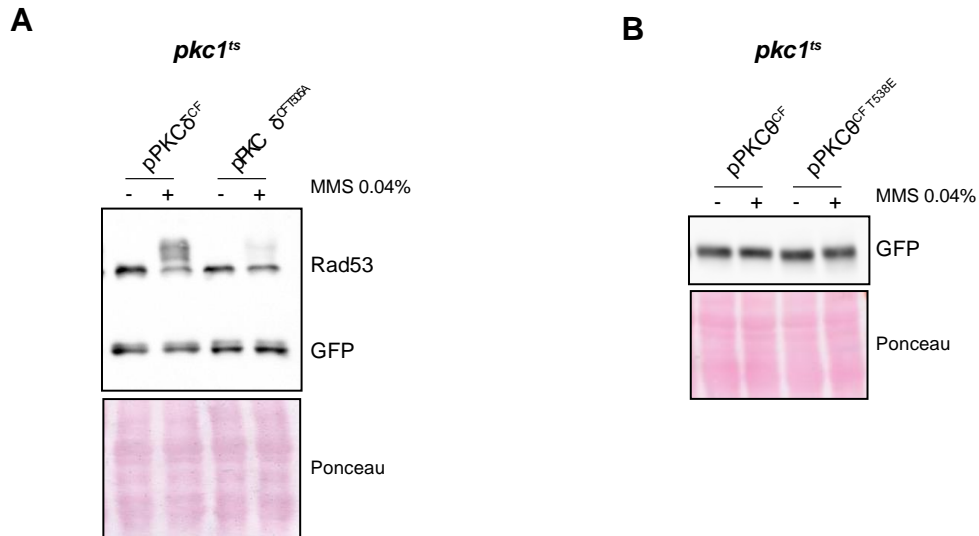

**Figure S4. Protein level analysis of PKC $\delta^{CF}$  and PKC $\theta^{CF}$  mutants.** Exponentially growing cultures of the *pkc1<sup>ts</sup>* (JC6-3a) strain transformed with plasmids **A)** pPKC $\delta^{CF}$ -GFP and pPKC $\delta^{CF505A}$ -GFP or **B)** pPKC $\theta^{CF}$ -GFP and pPKC $\theta^{CF538E}$ -GFP were transferred to 37°C for 3 hours and then incubated in the absence or presence of MMS 0.04% for 1 hour. The activation of Rad53 and protein levels of GFP-tagged proteins were detected by western blot. Ponceau staining of the membrane is shown as loading control.

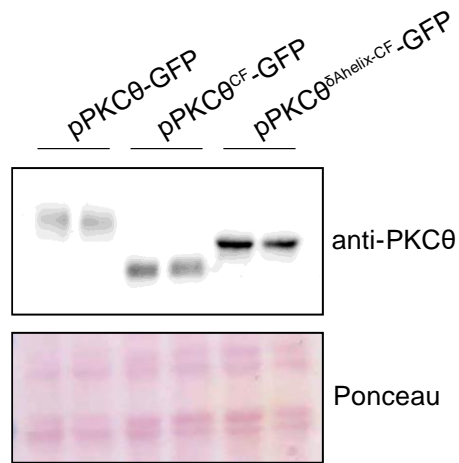

**Figure S5. Protein level analysis of PKCθ truncated versions.** Exponentially growing cultures of the *pkc1<sup>ts</sup>* (JC6-3a) strain transformed with plasmids pPKCθ-GFP, pPKCθ<sup>CF</sup>-GFP and pPKCθ<sup>CFT538E</sup>-GFP were transferred to 37°C for 3 hours and then incubated in the absence or presence of MMS 0.04% for 1 hour. Protein levels were detected by western blot with a rabbit mAb anti-PKCθ antibody (Cell Signaling Cat#13643). Ponceau staining of the membrane is shown as loading control.

**Table S1. Comparison of amino acids between novel PKCs.** PKC $\delta$  residues involved in the A-helix dependent mechanism of activation loop stabilization and the corresponding residues of the PKC $\theta$  and PKC $\epsilon$  isoforms.

| nPKC       | Contact 1          |                    | Contact 2          |                    | Contact 3          |                    |
|------------|--------------------|--------------------|--------------------|--------------------|--------------------|--------------------|
| $\delta$   | Tyr <sup>332</sup> | Phe <sup>498</sup> | Trp <sup>336</sup> | Arg <sup>397</sup> | Ile <sup>497</sup> | Phe <sup>525</sup> |
| $\theta$   | Gln                | Leu                | Trp                | Arg                | Met                | His                |
| $\epsilon$ | Asn                | Met                | Arg                | Arg                | Ile                | Pro                |

Table S2. Mutant versions of PKC $\delta$  and PKC $\theta$  proteins.

| Protein                           | Mutant version                                                              |
|-----------------------------------|-----------------------------------------------------------------------------|
| PKC $\delta$                      | PKC $\delta$ <sup>T505A</sup>                                               |
|                                   | PKC $\delta$ <sup>E500G</sup>                                               |
|                                   | PKC $\delta$ <sup>T505A,E500G</sup>                                         |
|                                   | PKC $\delta$ <sup>Y311,332,512F</sup>                                       |
|                                   | PKC $\delta$ <sup>Y311,332,512F,T505A</sup>                                 |
| PKC $\delta$ <sup>CF</sup>        | PKC $\delta$ <sup>CF T505A</sup>                                            |
|                                   | PKC $\delta$ <sup>CF E500G</sup>                                            |
|                                   | PKC $\delta$ <sup>CF T505A,E500G</sup>                                      |
| PKC $\delta$ <sup>Ahelix-CF</sup> | PKC $\delta$ <sup>Ahelix-CF T505A</sup>                                     |
|                                   | PKC $\delta$ <sup>Ahelix-CF E500G</sup>                                     |
|                                   | PKC $\delta$ <sup>Ahelix-CF T505A,E500G</sup>                               |
|                                   | PKC $\delta$ <sup>Ahelix-CF T505A,E500G,Y332Q,W336R,I497M,F498L,F525H</sup> |
|                                   | PKC $\delta$ <sup>Ahelix-CF T505A,I497A,F498A,F525A</sup>                   |
| PKC $\theta$                      | PKC $\theta$ <sup>T538A</sup>                                               |
| PKC $\theta$ <sup>CF</sup>        | PKC $\theta$ <sup>CF T538E</sup>                                            |

**Table S3. Oligonucleotides used for site-directed mutagenesis.** Mutated nucleotides are highlighted in bold.

| Point mutation     | Oligonucleotide | Sequence (5'-3')                             |
|--------------------|-----------------|----------------------------------------------|
| PKC $\delta$ Y311F | forward         | CTGTCGGAATAT <b>TT</b> CAGGGATTTGAGAAG       |
|                    | reverse         | CTTCTCAAATCCCTG <b>AA</b> ATATCCGACAG        |
| PKC $\delta$ Y332F | forward         | CAACGGGACCT <b>TT</b> GGCAAGATCTGGG          |
|                    | reverse         | CCCAGATCTTGCCA <b>AA</b> GGTCCCGTTG          |
| PKC $\delta$ Y332Q | forward         | CTAGACAACAACGGGACCC <b>CA</b> AGGCAAGATCTGGG |
|                    | reverse         | CCCAGATCTTGCC <b>TT</b> GGGTCCCGTTGTTGCTAG   |
| PKC $\delta$ W336R | forward         | GACCTATGGCAAGATCCGGGAGGGGAGCAC               |
|                    | reverse         | CGGGTGCTCCCCTCCCGGATCTTGCCATAG               |
| PKC $\delta$ I497M | forward         | CAAAGAGAATAT <b>G</b> TTTGGGGAG              |
|                    | reverse         | CTCCCCAAACATATTCTCTTTG                       |
| PKC $\delta$ I497A | forward         | GTGCAAAGAGAAT <b>G</b> CTTTTGGGGAGG          |
|                    | reverse         | CCTCCCCAAA <b>AG</b> CATTCTCTTTGCAC          |
| PKC $\delta$ F498L | forward         | GAATATATT <b>G</b> GGGGAGGGCCGG              |
|                    | reverse         | CCGGCCCTCCCC <b>CA</b> ATATATTC              |
| PKC $\delta$ F498A | forward         | GTGCAAAGAGAATAT <b>G</b> CTGGGGAGGGC         |
|                    | reverse         | GCCCTCCCC <b>AG</b> CTATATTCTCTTTGCAC        |
| PKC $\delta$ E500G | forward         | GAATATATTTGGGG <b>G</b> TGGCCGGGCCAG         |
|                    | reverse         | CTGGCCCGGCC <b>AC</b> CCCCAAATATATTC         |
| PKC $\delta$ T505A | forward         | GGCCGGGCCAGC <b>G</b> CTTTCTGCGGC            |
|                    | reverse         | GCCGCAGAA <b>AG</b> CGCTGGCCCGGCC            |
| PKC $\delta$ Y512F | forward         | GGCACTCCTGACT <b>TT</b> ATCGCCCCTG           |
|                    | reverse         | CAGGGGCGAT <b>AA</b> AGTCAGGAGTGCC           |
| PKC $\delta$ F525H | forward         | GGCCTGAAGTACTCC <b>CA</b> TCGGTGGACTG        |
|                    | reverse         | GTCCACCGA <b>AT</b> GAGTACTTCAG              |
| PKC $\delta$ F525A | forward         | GGCCTGAAGTACTCC <b>G</b> TCGGTGGACTG         |
|                    | reverse         | CAGTCCACCGA <b>AG</b> CGGAGTACTTCAGGCC       |
| PKC $\theta$ T538A | forward         | GCGAAGACAAAT <b>G</b> CTTTCTGTG              |
|                    | reverse         | CACAGAAAG <b>C</b> ATTTGTCTTCGC              |
| PKC $\theta$ T538E | forward         | GAAGACAAAT <b>GA</b> ATTCTGTGGAACTC          |
|                    | reverse         | GAGTTCCACAGA <b>ATT</b> CATTTGTCTTC          |
